# Supplementary material
Source: publisher site journal article supplement (https://www.dovepress.com/article/513105)
Supplement: Supplementary file 1 [file 513105%20Supplementary%20Material.docx]

**Cationic Liposome-Mediated Bcl-2 Gene Transfection in Bone Marrow Mesenchymal Stem Cells: A Novel Regenerative Approach for Spinal Cord Injury**

Haitao Yuan1#, Xiaojun Feng1#, Kamran Hidayat Ullah2, Bo Chu1, Tianqi Wang1, Xin Zhou1, Jun Gu1*

1 Department of Orthopedics, Xishan People's Hospital Of Wuxi City, Wuxi city, 204105, Jiangsu province, China

2 Department of Pharmacy, CECOS University of IT and Emerging Sciences, Peshawar, Pakistan.

Supplementary Figure S1. Q-Q plot for data involved in ELISA results for Bcl-2 protein.


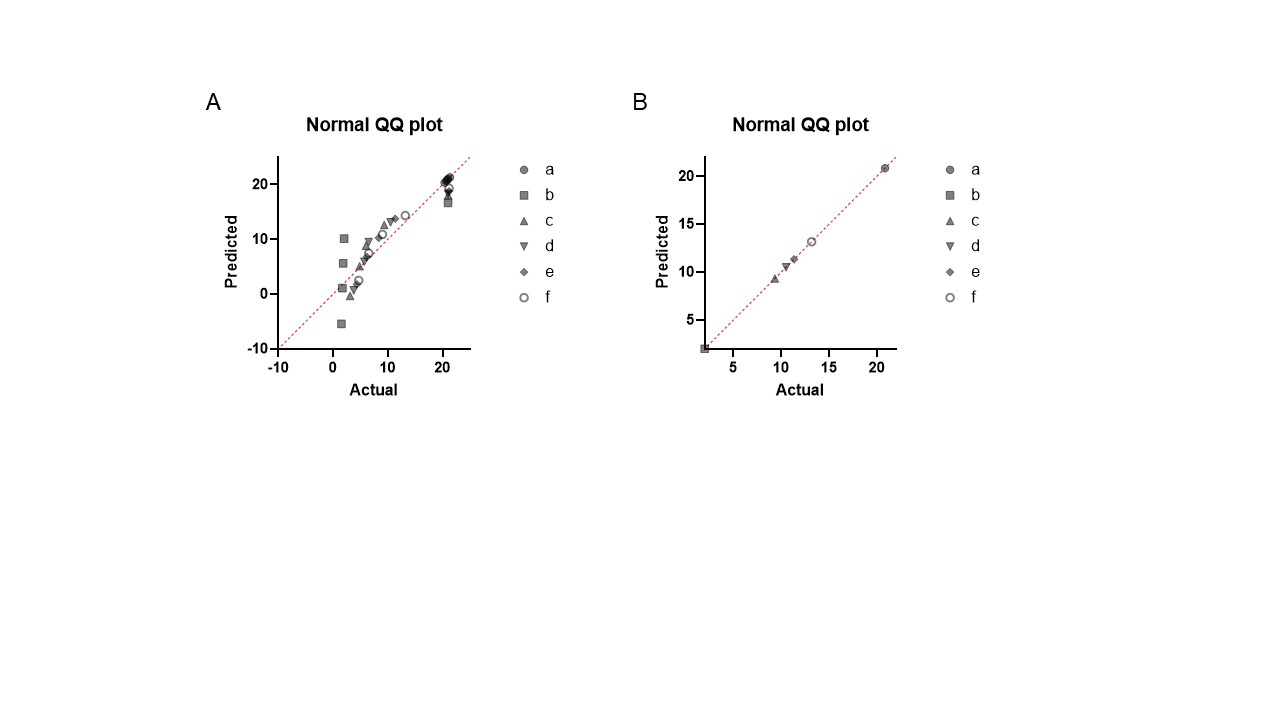


Supplementary Figure S2. Q-Q plot for data involved in (A) BBB scores and (B) inclined plane test scores.
